# Supplementary material for: Large Language Models for the assessment of medical students’ clinical decision-making
Source: Research Square preprint supplement (doi:10.21203/rs.3.rs-6660928/v1), 2025-06-17
Supplement: Supplementary file 1 [file d39998e1419f69d24df07fcc.docx]

**Supplemental files**

Analysis Code

# Load required libraries

library(tidyverse)

library(irr) # for kappa and ICC

library(psych) # for ICC

library(readxl)

# Set working directory and file paths

base_path <- "PATH/"

file_path <- paste0(base_path, "ICC_full.xlsx")

# Create results directory if it doesn't exist

results_dir <- paste0(base_path, "results/")

dir.create(results_dir, showWarnings = FALSE)

# Read the Excel file

data <- read_excel(file_path)

# Function to calculate agreement metrics for ordinal ratings with half-points

calculate_ordinal_agreement <- function(human_data, ai_data, rater_names) {

# Calculate ICC

icc_result <- ICC(cbind(human_data, ai_data))

# Calculate Mean Absolute Error

mae <- mean(abs(human_data - ai_data))

# Calculate agreement within 0.5 and 1 point

agreement_within_half <- mean(abs(human_data - ai_data) <= 0.5)

agreement_within_one <- mean(abs(human_data - ai_data) <= 1)

# Create results dataframe

results <- data.frame(

Comparison = paste(rater_names[1], "vs AI"),

ICC = icc_result$results[2, "ICC"],

MAE = mae,

Agreement_Within_Half = agreement_within_half,

Agreement_Within_One = agreement_within_one,

Correlation = cor(human_data, ai_data, method = "spearman")

)

return(results)

}

# Calculate item-wise agreement

results_list <- list()

# Loop through each item (1-8)

for(i in 1:8) {

# Get ratings for specific item from each rater

h1_item <- data[[paste0("r1_", i)]]

h2_item <- data[[paste0("r2_", i)]]

ai_item <- data[[paste0("ai_", i)]]

# Calculate agreement metrics for this item

item_result <- rbind(

calculate_ordinal_agreement(h1_item, ai_item, c("Human 1", "AI")),

calculate_ordinal_agreement(h2_item, ai_item, c("Human 2", "AI"))

)

# Add item number

item_result$Item <- i

# Add to results list

results_list[[i]] <- item_result

}

# Combine all results into a single data frame

item_results_df <- do.call(rbind, results_list)

# Create summary using the data frame

summary_df <- item_results_df %>%

group_by(Comparison) %>%

summarise(

Mean_ICC = mean(ICC),

Mean_MAE = mean(MAE),

Mean_Agreement_Within_Half = mean(Agreement_Within_Half),

Mean_Agreement_Within_One = mean(Agreement_Within_One),

Mean_Correlation = mean(Correlation),

.groups = 'drop'

)

# Save both detailed and summary results

write.csv(item_results_df, paste0(results_dir, "item_wise_agreement_metrics.csv"), row.names = FALSE)

write.csv(summary_df, paste0(results_dir, "summary_agreement_metrics.csv"), row.names = FALSE)

# Create plots directory

plots_dir <- paste0(results_dir, "plots/")

dir.create(plots_dir, showWarnings = FALSE)

# Create plots for each item

for(i in 1:8) {

item_data <- data.frame(

Human = c(data[[paste0("r1_", i)]], data[[paste0("r2_", i)]]),

AI = c(data[[paste0("ai_", i)]], data[[paste0("ai_", i)]]),

Comparison = rep(c("Human 1 vs AI", "Human 2 vs AI"), each = nrow(data))

)

# Create agreement plot with fixed axis ranges

p <- ggplot(item_data, aes(x = Human, y = AI)) +

geom_jitter(alpha = 0.3, width = 0.1, height = 0.1) +

geom_smooth(method = "lm", se = FALSE, color = "red") +

facet_wrap(~Comparison) +

scale_x_continuous(breaks = seq(1, 5, 0.5), limits = c(1, 5)) +

scale_y_continuous(breaks = seq(1, 5, 0.5), limits = c(1, 5)) +

labs(title = paste("Agreement between Human Raters and AI - Item", i),

x = "Human Score",

y = "AI Score") +

theme_minimal() +

coord_fixed() +

# Add diagonal line for perfect agreement

geom_abline(intercept = 0, slope = 1, linetype = "dashed", alpha = 0.5)

ggsave(paste0(plots_dir, "agreement_plot_item_", i, ".png"), p, width = 12, height = 6)

# Create separate heatmaps for each comparison

for(comp in unique(item_data$Comparison)) {

comp_data <- item_data[item_data$Comparison == comp,]

# All possible ratings

all_ratings <- seq(1, 5, 0.5)

# Count actual occurrences

counts <- table(factor(comp_data$Human), factor(comp_data$AI))

heatmap_data <- as.data.frame(counts)

names(heatmap_data) <- c("Human", "AI", "Freq")

h <- ggplot(heatmap_data, aes(x = Human, y = AI, fill = Freq)) +

geom_tile() +

scale_fill_gradient(low = "white", high = "blue") +

labs(title = paste("Rating Distribution Heatmap -", comp, "- Item", i),

x = "Human Score",

y = "AI Score") +

theme_minimal() +

scale_x_discrete(limits = as.character(all_ratings)) +

scale_y_discrete(limits = as.character(all_ratings)) +

coord_fixed()

ggsave(paste0(plots_dir, "heatmap_", gsub(" vs ", "_", comp), "_item_", i, ".png"),

h, width = 8, height = 8)

}

}

print("Analysis complete! Results saved in the 'results' folder.")

# Load required libraries

library(tidyverse)

library(gridExtra)

# Set working directory and file paths

base_path <- "PATH/"

results_dir <- paste0(base_path, "results/")

file_path <- paste0(base_path, "ICC_full.xlsx")

# Read the Excel file

data <- read_excel(file_path)

# Create a long format dataset with all items

all_items_data <- data.frame(

Human = numeric(),

AI = numeric(),

Comparison = character(),

Item = numeric()

)

for(i in 1:8) {

item_data <- data.frame(

Human = c(data[[paste0("r1_", i)]], data[[paste0("r2_", i)]]),

AI = c(data[[paste0("ai_", i)]], data[[paste0("ai_", i)]]),

Comparison = rep(c("Human 1 vs AI", "Human 2 vs AI"), each = nrow(data)),

Item = i

)

all_items_data <- rbind(all_items_data, item_data)

}

# Create aggregated agreement plot

p_agreement <- ggplot(all_items_data, aes(x = Human, y = AI)) +

geom_jitter(alpha = 0.2, width = 0.1, height = 0.1) +

geom_smooth(method = "lm", se = TRUE, color = "red") +

facet_wrap(~Comparison) +

scale_x_continuous(breaks = seq(1, 5, 0.5), limits = c(1, 5)) +

scale_y_continuous(breaks = seq(1, 5, 0.5), limits = c(1, 5)) +

labs(title = "Aggregated Agreement between Human Raters and AI (All Items)",

x = "Human Score",

y = "AI Score") +

theme_minimal() +

coord_fixed() +

geom_abline(intercept = 0, slope = 1, linetype = "dashed", alpha = 0.5)

# Create aggregated heatmaps

all_ratings <- seq(1, 5, 0.5)

heatmap_list <- list()

for(comp in unique(all_items_data$Comparison)) {

comp_data <- all_items_data[all_items_data$Comparison == comp,]

# Count actual occurrences

counts <- table(factor(comp_data$Human, levels = all_ratings),

factor(comp_data$AI, levels = all_ratings))

heatmap_data <- as.data.frame(as.table(counts))

names(heatmap_data) <- c("Human", "AI", "Freq")

# Calculate percentage instead of raw counts

heatmap_data$Percentage <- (heatmap_data$Freq / sum(heatmap_data$Freq)) * 100

h <- ggplot(heatmap_data, aes(x = Human, y = AI, fill = Percentage)) +

geom_tile() +

scale_fill_gradient(low = "white", high = "blue",

name = "Percentage (%)") +

labs(title = paste("Aggregated Rating Distribution -", comp),

x = "Human Score",

y = "AI Score") +

theme_minimal() +

theme(axis.text.x = element_text(angle = 45, hjust = 1)) +

coord_fixed()

heatmap_list[[comp]] <- h

}

# Combine plots

combined_plot <- grid.arrange(

p_agreement,

arrangeGrob(heatmap_list[[1]], heatmap_list[[2]], ncol = 2),

heights = c(1, 1),

nrow = 2,

top = "Aggregated Analysis of Human-AI Rating Agreement"

)

# Save the combined plot

ggsave(

paste0(results_dir, "aggregated_analysis.png"),

combined_plot,

width = 15,

height = 12

)

# Calculate overall agreement metrics

overall_metrics <- all_items_data %>%

group_by(Comparison) %>%

summarise(

MAE = mean(abs(Human - AI)),

Agreement_Within_Half = mean(abs(Human - AI) <= 0.5),

Agreement_Within_One = mean(abs(Human - AI) <= 1),

Correlation = cor(Human, AI, method = "spearman"),

.groups = 'drop'

)

# Save overall metrics

write.csv(overall_metrics,

paste0(results_dir, "overall_agreement_metrics.csv"),

row.names = FALSE)
